# Supplementary material
Source: Springer Nature journal article supplement (https://www.springermedizin.de/resource/supplementary/12969_2013_995_MOESM4_ESM.pdf/9589176)

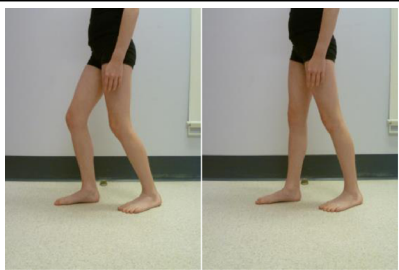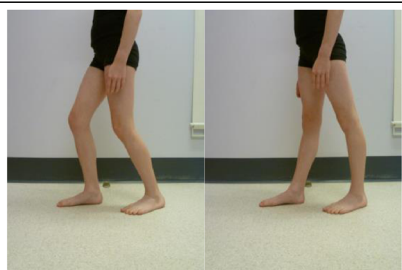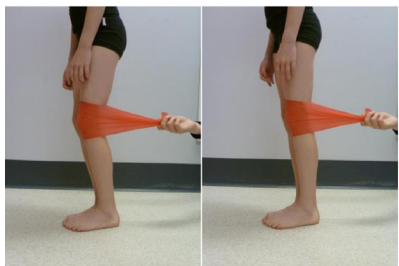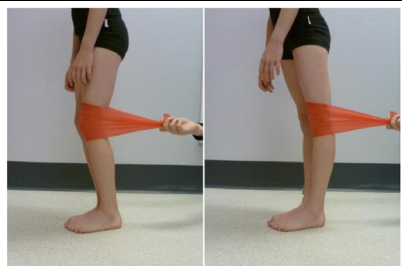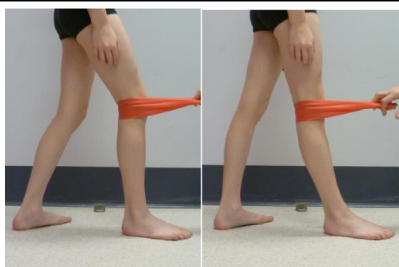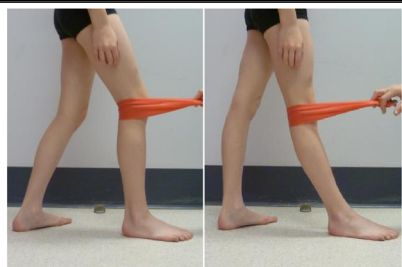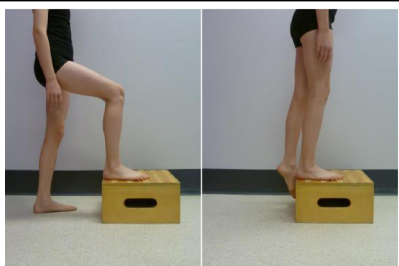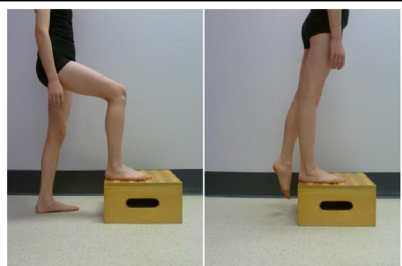

Exercises to neutral knee extension only

Exercises to full knee hyperextension range

Supplement: MOESM4 [file 9589176]
